# Supplementary material for: Arabidopsis aux1rcr1 mutation alters AUXIN RESISTANT1 targeting and prevents expression of the auxin reporter DR5:GUS in the root apex
Source: PubMed Central journal article supplement — J Exp Bot. 2013 Jan 4;64(4):921–33. doi: 10.1093/jxb/ers371 (PMC3580809; doi:10.1093/jxb/ers371), 2013-01-04
Supplement: supp_ers371_jexbot087403_file001.pdf [file supp_ers371_jexbot087403_file001.pdf]

## Title

**Arabidopsis *aux1<sup>rcr1</sup>* Mutation Alters Auxin Resistant1 Targeting and Prevents Expression of the Auxin Reporter *DR5:GUS* in the Root Apex**

**Authors:** Jing Yu and Chi-Kuang Wen

## Supplemental Data S1. Primer sequence and the cloning of transgenes for this study.

The primer sets for qRT-PCR are CTR1-RT-F2

(5'-GCTTATCTGCAATCGTATGGG-3') and CTR1-RT-R2

(5'-GGCAATTCGACAGGGTAAAT-3') for *CTR1*, AUX1-RT-wR

(5'-GAACCAAGTAATCCATCAAG-3') and AUX1/rcr1-RT-F

(5'-CAGGAATAGTACTTCAGATC-3') for *AUX1*, and rcr-RT-mR (5'-

GAACCAAGTAATCCATCAAAA-3') and AUX1/rcr1-RT-F

(5'-CAGGAATAGTACTTCAGATC-3') for *aux1<sup>rcr1</sup>*. Gene expression measurement

was presented as mean±SE (standard error for the mean of three measurements of

three independent biological samples). The primer sets for genotyping are CTR1-LB

(5'-AGTGGACTCTTGTTCCAAACTG-3') and ctr1-10-R

(5'-CCACTGGATTGCCTTTGCAACC-3') for *ctr1-10*, AUX1-T-R

(5'-GACAGTGGTTGCACAACACG-3') and aux1-LB

(5'-AGTGGACTCTTGTTCCAAACTG-3') for *aux1-T*, CTR1-F

(5'-GGATCCAATGTTACGGATTCAG-3') and ctr1-10-R

(5'-CCACTGGATTGCCTTTGCAACC-3') for *CTR1*, and AUX1-F

(5'-TGACAACGGAACAGATCAGGT-3') and AUX1-R

(5'-GACAGTGGTTGCACAACACG-3') for *AUX1*. For the genotyping of *aux1<sup>rcr1</sup>*,

the primers set AUX1-RsaI-F (5'-TCAGATCTTCTATGGTTTACTAGG-3') and

AUX1-RsaI-R (5'-GGTGTAAGTGGTCATTCCAAGG-3') generated an *AUX1*

fragment by PCR, and the wild-type but not *aux1<sup>rcr1</sup>* fragment was restricted by *RsaI*.

## Cloning of transgenes and *Agrobacterium*-mediated transformation

To clone *AUX1*, genomic DNA from the wild-type (Col-0) plant was used as the PCR

template. The primer sets AUX1-ATG-F-KpnI (5'-CCAGGTACCATGTTCGGAAGAAGTAG-3') and AUX1-SacI-R (5'-CTTTACGAGCTCTGTATTCG-3') generated an *XbaI-SacI* fragment. The primer set AUX1-SacI-F (5'-CGAATACAGAGCTCGTAAAG-3') and AUX-AflIII-R (5'-GCCAAAGCCCTTAAGCAAATG-3') generated a *SacI-AflIII* fragment. The primer set AUX1-AflIII-F (5'-CATTTGCTTAAGGGCTTTGGC-3') and AUX1-BamHI-R (5'-CACGGATCC GTTCATGGTAA-3') generated an *AflIII-BamHI* fragment. The resulting 3 fragments were each cloned to pBluescript SK. Each clone was confirmed by sequencing, and the DNA fragments were ligated to generate a full length genomic DNA clone. The resulting genomic *AUXI* was released by *XbaI* and cloned to pART 7, which has the 35S promoter, released with *NotI*, and cloned to the binary vector pBmart. To clone the genomic *auxI<sup>rcr1</sup>*, the genomic DNA from the *auxI<sup>rcr1</sup>* mutant was used as the template for PCR cloning, and the cloning was followed as described for the genomic *AUXI* cloning. To clone genomic *CTR1*, the bacterial artificial chromosome (BAC) clone F17C15 (from ARBC) was restricted with *XhoI* and *XbaI*, and the resulting DNA fragments were sub-cloned to pBluescript SK. The *CTR1* clone was then restricted with *KpnI* and *XbaI*, and the resulting fragment was cloned to the binary vector pCAMBIA1301. For clones encoding *auxI<sup>rcr1</sup>* with the Green Fluorescence Protein (GFP) fusion, the primer AUX1-ATG-KpnI-F (5'-CCAGGTACCATGTTCGGAAGGAGTAG-3') pairing with AUX1-116-EcoRI-R (5'- GAGGAATTCTTTGAAGCTTTTGCCTTC-3') and AUX1-165-EcoRI-R (5'- GAG GAATTC GTTTATGTAATAAATG-3') generated *auxI<sup>rcr1</sup>* DNA fragments encoding *auxI<sup>rcr1</sup> 1-116* and *auxI<sup>rcr1</sup> 1-165*, respectively. The primer set GFP-ATG-EcoRI-F (5'- GCGAATTCATGAGTAAAGGAG-3') and GFP-BamHI-R (5'- CAGGATCCGATAGATCTGTATAGTTC-3') was for the GFP-encoding fragment. The primer AUX1-AflIII-R (5'-GCCAAAGCCCTTAAGCAAATG-3') pairing with AUX1-116-BamHI- F (5'-TCGGATCCAACCACGTCATTCAGGTC -3) and AUX1-165-BamHI-F (5'-CAGGATCC GATCATCTGGACAAGAG-3') generated the *auxI<sup>rcr1</sup> 116-354* and *auxI<sup>rcr1</sup> 165-354* fragments, respectively. The primer set AUX1-AflIII-F (5'-CATTTGCTTAAGGGCTTTGGC-3') and AUX1-BamHI -R (5'-CACGGATCCGTTTCATGGTAA-3') generated the *auxI<sup>rcr1</sup> 354-485* fragment. These *auxI<sup>rcr1</sup>* fragments and the GFP-encoding fragment were each cloned to pBluescript SK. Each clone was confirmed by sequencing, released by corresponding restriction

enzymes, and sequentially ligated to produce *GFP-116-aux1<sup>rcr1</sup>* and *GFP-165-aux1<sup>rcr1</sup>*. The *GFP-116-aux1<sup>rcr1</sup>* and *GFP-165-aux1<sup>rcr1</sup>* clones were each restricted by *Kpn*I and *Xba* I, and cloned to pCAMBIA1301 containing the 35S promoter. Phenotypic analyses of those transformation lines were carried out in the F<sub>3</sub>, or higher, generations. The transgenes were each transformed to *Arabidopsis* by *Agrobacterium* as described (Clough and Bent, 1998).

## Reference:

Clough SJ, Bent AF (1998) Floral dip: a simplified method for *Agrobacterium*-mediated transformation of *Arabidopsis thaliana*. *The Plant Journal* **16**: 735-743

## Supplemental Figure S2. qRT-PCR of *AUX1* in *aux1<sup>rcr1</sup>* 35S:*AUX1* DR5:*GUS* lines.

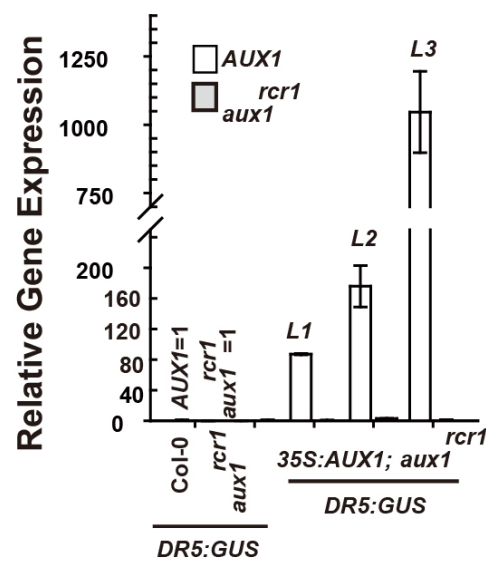

Supplemental Figure S2. qRT-PCR of *AUX1* in *aux1<sup>rcr1</sup>* 35S:*AUX1* DR5:*GUS* lines. *AUX1* and *aux1<sup>rcr1</sup>* levels in the wild type and *aux1<sup>rcr1</sup>* are respectively referenced as value of 1 (*AUX1*=1 and *aux1<sup>rcr1</sup>*=1) for the measurement of *AUX1* levels in *aux1<sup>rcr1</sup>* 35S:*AUX1* DR5:*GUS* lines. Data are mean±SE of 3 measurements from 3 independent biological samples.

**Supplemental Figure S3.** *DR5:GUS* expression in root apices for genotypes with *aux1<sup>rcr1</sup>*.

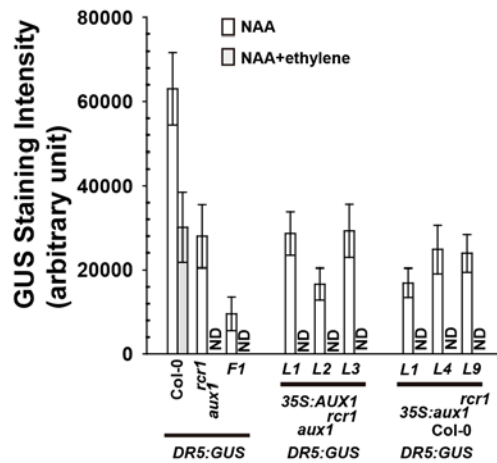

**Supplemental Figure S3.** *DR5:GUS* expression in root apices for genotypes with *aux1<sup>rcr1</sup>*. GUS expression is quantified by measurement of GUS staining intensity with ImageJ (NIH) for at least 15 individual chloral-hydrate-cleared roots ( $n \geq 15$ ) for each genotype in each treatment. Error bars indicate the standard deviation for a mean. F1: the F1 of the cross of the wild type (Col-0) and *aux1<sup>rcr1</sup>* that carry the *DR5:GUS* transgene. ND: GUS staining is not detectable for NAA and ethylene treatment.
